# Supplementary material
Source: PubMed Central journal article supplement (PMC117363)

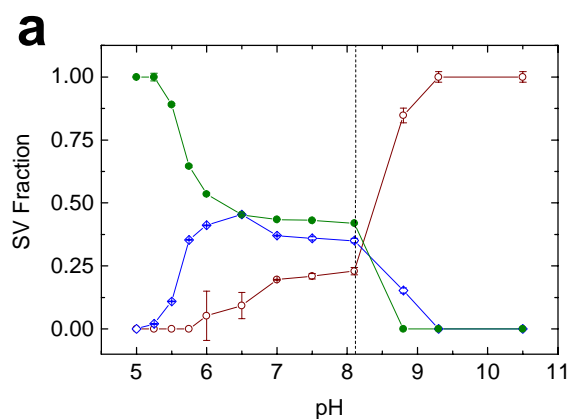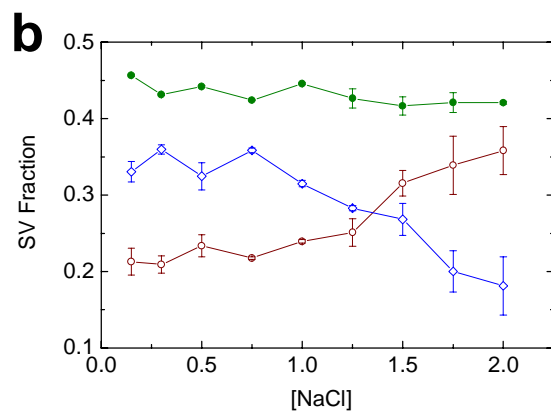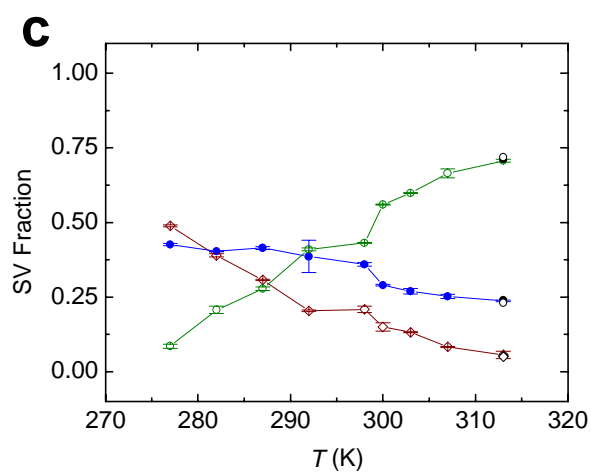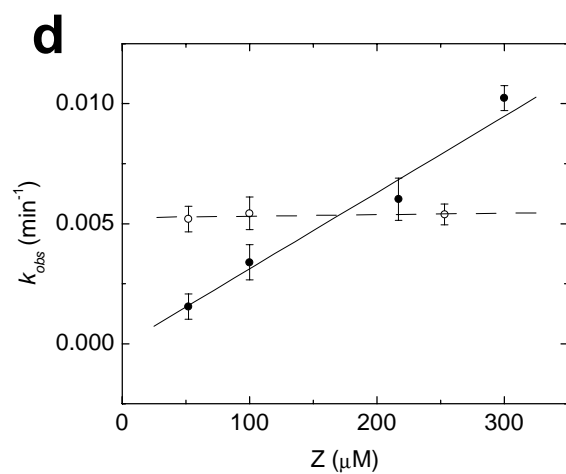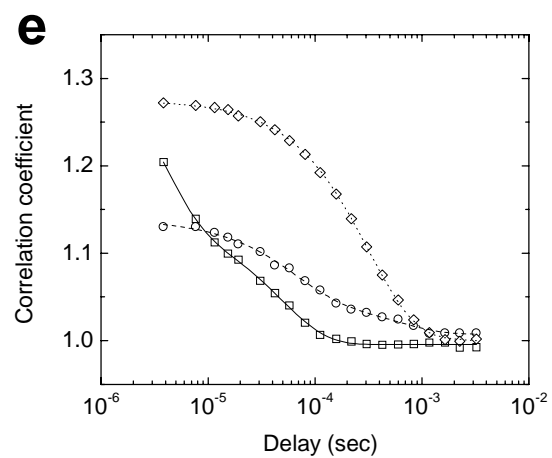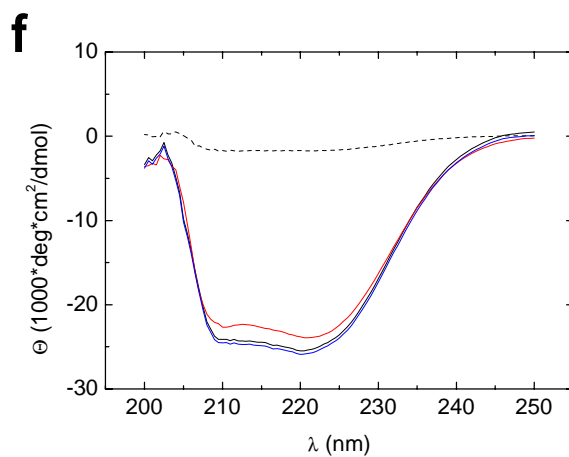

Supplement: pnas_012317299_4.pdf [file pnas_012317299_4.pdf]
